# Supplementary material
Source: PubMed Central journal article supplement (PMC8245180)
Supplement: jci-131-136778-s044.pdf [file jci-131-136778-s044.pdf]

## Supplemental tables

**Table S I.** Top ranked genes for single-cell RNA sequencing analysis cluster.

| <b>genes</b> | <b>logfoldchanges</b> | <b>score</b> | <b>P-value</b> | <b>cluster</b>    |
|--------------|-----------------------|--------------|----------------|-------------------|
| Ms4a2        | 32,17730713           | 4,885575771  | 1,03127E-06    | <i>Basophil</i>   |
| Mcpt8        | 30,8923893            | 3,053484917  | 0,002262       | <i>Basophil</i>   |
| Fcer1a       | 14,95272446           | 4,885575771  | 1,03127E-06    | <i>Basophil</i>   |
| Cpa3         | 12,7094593            | 4,883338928  | 1,04304E-06    | <i>Basophil</i>   |
| Cyp11a1      | 10,95959663           | 3,661199331  | 0,000251037    | <i>Basophil</i>   |
| Cd200r3      | 10,23174095           | 4,270777702  | 1,94792E-05    | <i>Basophil</i>   |
| Gata2        | 9,726697922           | 4,266676903  | 1,98406E-05    | <i>Basophil</i>   |
| Il6          | 9,017007828           | 3,037453175  | 0,002385864    | <i>Basophil</i>   |
| Rab44        | 8,831991196           | 3,041927099  | 0,002350687    | <i>Basophil</i>   |
| Hdc          | 8,333846092           | 4,85425806   | 1,20838E-06    | <i>Basophil</i>   |
| Ifitm1       | 6,255457401           | 3,474038124  | 0,000512688    | <i>Basophil</i>   |
| Ccl3         | 5,630964279           | 3,196651936  | 0,001390325    | <i>Basophil</i>   |
| Ccl4         | 5,249568462           | 3,131033897  | 0,001741921    | <i>Basophil</i>   |
| Cd7          | 5,219405651           | 3,473292589  | 0,000514115    | <i>Basophil</i>   |
| Ccl6         | 4,417239666           | 3,572465658  | 0,000353636    | <i>Basophil</i>   |
| Cd79a        | 7,740267754           | 26,43621254  | 5,2566E-154    | <i>B cell</i>     |
| Ly6d         | 7,35939455            | 24,84671783  | 2,806E-136     | <i>B cell</i>     |
| Ms4a1        | 7,12919569            | 24,83703995  | 3,57E-136      | <i>B cell</i>     |
| Ebf1         | 6,799319744           | 25,2107811   | 3,0511E-140    | <i>B cell</i>     |
| Fcmmr        | 6,702617168           | 20,79995346  | 4,33232E-96    | <i>B cell</i>     |
| Mzb1         | 6,31575489            | 18,88094521  | 1,63631E-79    | <i>B cell</i>     |
| Cd79b        | 6,153306961           | 26,15522385  | 8,5949E-151    | <i>B cell</i>     |
| Gm43603      | 5,92986393            | 20,7942276   | 4,88141E-96    | <i>B cell</i>     |
| Bank1        | 5,764195442           | 20,46655655  | 4,27803E-93    | <i>B cell</i>     |
| Fcrla        | 5,708143234           | 16,42088318  | 1,35579E-60    | <i>B cell</i>     |
| H2-DMb2      | 5,518703461           | 23,5134697   | 2,97E-122      | <i>B cell</i>     |
| Siglecg      | 4,954312801           | 16,98919868  | 9,87303E-65    | <i>B cell</i>     |
| H2-Ob        | 4,809836388           | 18,07178307  | 5,31671E-73    | <i>B cell</i>     |
| Ralgps2      | 4,658328533           | 16,62799454  | 4,36973E-62    | <i>B cell</i>     |
| H2-Oa        | 4,252504349           | 17,28592873  | 6,0046E-67     | <i>B cell</i>     |
| Tcf7         | 4,513453007           | 13,56557465  | 6,40755E-42    | <i>CD4 T cell</i> |
| Lef1         | 4,489587307           | 12,69128132  | 6,60956E-37    | <i>CD4 T cell</i> |
| Cd3g         | 4,359367371           | 15,48692513  | 4,25144E-54    | <i>CD4 T cell</i> |
| Cd3d         | 4,275510311           | 15,30279732  | 7,32393E-53    | <i>CD4 T cell</i> |
| Lat          | 4,019424438           | 13,23984528  | 5,16551E-40    | <i>CD4 T cell</i> |
| Ms4a4b       | 3,832198143           | 14,97555923  | 1,06072E-50    | <i>CD4 T cell</i> |
| Tmsb10       | 1,814377427           | 13,13952541  | 1,95449E-39    | <i>CD4 T cell</i> |
| Rpl12        | 1,558308005           | 15,21677113  | 2,7371E-52     | <i>CD4 T cell</i> |
| Rpl5         | 1,164606333           | 14,22511196  | 6,40016E-46    | <i>CD4 T cell</i> |
| Rpl13a       | 1,108007312           | 13,73043728  | 6,673E-43      | <i>CD4 T cell</i> |
| Rps27        | 1,076374292           | 12,76496792  | 2,57258E-37    | <i>CD4 T cell</i> |
| Rps7         | 1,060416102           | 14,07960415  | 5,06932E-45    | <i>CD4 T cell</i> |
| Rps15a       | 1,060255647           | 14,03175163  | 9,96588E-45    | <i>CD4 T cell</i> |
| Gm10073      | 1,059884548           | 12,80953503  | 1,45002E-37    | <i>CD4 T cell</i> |

|          |             |             |             |                        |
|----------|-------------|-------------|-------------|------------------------|
| Rps24    | 1,041148901 | 14,16500854 | 1,50848E-45 | <i>CD4 T cell</i>      |
| Cd8b1    | 6,919670105 | 14,25400352 | 4,23304E-46 | <i>CD8 T cell</i>      |
| Nkg7     | 5,828896523 | 14,91225433 | 2,74331E-50 | <i>CD8 T cell</i>      |
| Cd3g     | 5,196243286 | 16,40915108 | 1,64488E-60 | <i>CD8 T cell</i>      |
| Cd3d     | 5,186452866 | 16,85204124 | 1,01355E-63 | <i>CD8 T cell</i>      |
| Thy1     | 4,906655312 | 15,2247591  | 2,42251E-52 | <i>CD8 T cell</i>      |
| Ms4a4b   | 4,83349371  | 16,36470032 | 3,41709E-60 | <i>CD8 T cell</i>      |
| Lck      | 4,134778976 | 13,33833313 | 1,38522E-40 | <i>CD8 T cell</i>      |
| Lat      | 4,000152111 | 12,48033619 | 9,55824E-36 | <i>CD8 T cell</i>      |
| AW112010 | 2,761917591 | 12,46634865 | 1,13927E-35 | <i>CD8 T cell</i>      |
| Saraf    | 2,309516191 | 13,27491283 | 3,23647E-40 | <i>CD8 T cell</i>      |
| Tmsb10   | 2,153654337 | 14,93543816 | 1,93795E-50 | <i>CD8 T cell</i>      |
| Rpl22l1  | 1,552589536 | 12,63016987 | 1,43968E-36 | <i>CD8 T cell</i>      |
| Rpl12    | 1,524740815 | 14,1247673  | 2,67282E-45 | <i>CD8 T cell</i>      |
| Rpl13a   | 1,315062165 | 14,8501749  | 6,9387E-50  | <i>CD8 T cell</i>      |
| Rpsa     | 1,281026483 | 14,58432674 | 3,53393E-48 | <i>CD8 T cell</i>      |
| Cd209a   | 7,084644    | 9,428524    | 4,16E-21    | <i>Dendritic cells</i> |
| Ffar2    | 6,474395    | 7,935768    | 2,09E-15    | <i>Dendritic cells</i> |
| Flt3     | 5,387873    | 8,287161    | 1,16E-16    | <i>Dendritic cells</i> |
| Klrb1b   | 5,320319    | 7,995071    | 1,29E-15    | <i>Dendritic cells</i> |
| Ifitm1   | 4,323915    | 7,725995    | 1,11E-14    | <i>Dendritic cells</i> |
| Clec10a  | 3,970304    | 8,628596    | 6,21E-18    | <i>Dendritic cells</i> |
| H2-Eb1   | 3,815535    | 12,81378    | 1,37E-37    | <i>Dendritic cells</i> |
| H2-Aa    | 3,774281    | 13,03738    | 7,5E-39     | <i>Dendritic cells</i> |
| Klrd1    | 3,760131    | 9,432617    | 4E-21       | <i>Dendritic cells</i> |
| H2-Ab1   | 3,758918    | 13,04911    | 6,43E-39    | <i>Dendritic cells</i> |
| Cd74     | 3,682577    | 12,35097    | 4,81E-35    | <i>Dendritic cells</i> |
| Cbfa2t3  | 3,473026    | 11,21492    | 3,45E-29    | <i>Dendritic cells</i> |
| Olfm1    | 3,329613    | 10,15454    | 3,16E-24    | <i>Dendritic cells</i> |
| Bhlhe40  | 3,171868    | 8,661235    | 4,67E-18    | <i>Dendritic cells</i> |
| Plscr1   | 3,15024     | 8,928431    | 4,32E-19    | <i>Dendritic cells</i> |
| Lyz2     | 5,86966     | 31,52023    | 4,60E-218   | <i>Mono_macs</i>       |
| C1qb     | 5,293979    | 24,27806    | 3,30E-130   | <i>Mono_macs</i>       |
| Ms4a7    | 5,277662    | 23,96194    | 6,90E-127   | <i>Mono_macs</i>       |
| ApoE     | 4,955027    | 30,22719    | 1,00E-200   | <i>Mono_macs</i>       |
| C5ar1    | 4,909602    | 24,92502    | 4,00E-137   | <i>Mono_macs</i>       |
| Trem2    | 4,87865     | 24,98375    | 9,20E-138   | <i>Mono_macs</i>       |
| Adgre1   | 4,743454    | 25,82356    | 4,80E-147   | <i>Mono_macs</i>       |
| C3ar1    | 4,596313    | 24,15751    | 6,20E-129   | <i>Mono_macs</i>       |
| Fcgr3    | 4,574409    | 29,45475    | 1,10E-190   | <i>Mono_macs</i>       |
| Mafb     | 4,560227    | 25,82833    | 4,30E-147   | <i>Mono_macs</i>       |
| Ctsb     | 4,493658    | 31,3882     | 2,90E-216   | <i>Mono_macs</i>       |
| Fcer1g   | 4,40872     | 31,15072    | 5,00E-213   | <i>Mono_macs</i>       |
| Cd14     | 4,285527    | 25,41162    | 1,90E-142   | <i>Mono_macs</i>       |
| Aif1     | 4,197026    | 26,54554    | 2,90E-155   | <i>Mono_macs</i>       |
| Csf1r    | 4,193206    | 28,82995    | 9,00E-183   | <i>Mono_macs</i>       |
| Ncr1     | 11,20700359 | 8,590027809 | 8,69482E-18 | <i>NK cells</i>        |
| Klra8    | 10,77591133 | 5,938164711 | 2,8823E-09  | <i>NK cells</i>        |
| Gzma     | 10,68203545 | 7,235824108 | 4,6271E-13  | <i>NK cells</i>        |
| Klrb1a   | 9,677329063 | 4,947109699 | 7,53235E-07 | <i>NK cells</i>        |

|        |             |             |             |                 |
|--------|-------------|-------------|-------------|-----------------|
| Klrb1c | 9,55841732  | 8,900306702 | 5,56926E-19 | <i>NK cells</i> |
| Klre1  | 8,628218651 | 8,564511299 | 1,08535E-17 | <i>NK cells</i> |
| Ccl5   | 8,304552078 | 8,601051331 | 7,89894E-18 | <i>NK cells</i> |
| Gzmb   | 7,445357323 | 6,201085091 | 5,60751E-10 | <i>NK cells</i> |
| Nkg7   | 7,269181728 | 8,809672356 | 1,25512E-18 | <i>NK cells</i> |
| Klrb1f | 7,001911163 | 5,556236267 | 2,75654E-08 | <i>NK cells</i> |
| Fasl   | 6,977669239 | 5,54847908  | 2,88165E-08 | <i>NK cells</i> |
| Xcl1   | 6,944013596 | 6,153522968 | 7,57805E-10 | <i>NK cells</i> |
| Klrk1  | 6,69391346  | 8,400798798 | 4,43452E-17 | <i>NK cells</i> |
| Car2   | 6,611712933 | 5,838140488 | 5,27866E-09 | <i>NK cells</i> |
| Il2rb  | 6,242600441 | 6,46196413  | 1,03352E-10 | <i>NK cells</i> |

---

**Table S II.** Description of patients enrolled in leukocyte kinetics study.

| <b>Baseline characteristics</b> | <b>Control</b><br>( <i>n</i> = 9) | <b>STEMI</b><br>( <i>n</i> = 11) | <b><i>P</i>-value</b> |
|---------------------------------|-----------------------------------|----------------------------------|-----------------------|
| Female sex                      | 2 (22.2 %)                        | 1 (9.1 %)                        | <i>P</i> = 0.43       |
| Age (mean ± SD)                 | 70.2 (± 9.1)                      | 65.6 (± 13.9)                    | <i>P</i> = 0.46       |
| CV risk                         |                                   |                                  |                       |
| Diabetes mellitus               | 2 (22.2 %)                        | 1 (9.1 %)                        | <i>P</i> = 0.43       |
| Smoker                          | 2 (22.2 %)                        | 3 (27.3 %)                       | <i>P</i> = 0.80       |
| Hypertension                    | 7 (77.8 %)                        | 8 (72.7 %)                       | <i>P</i> = 0.80       |
| Hypercholesterolemia            | 5 (55.6 %)                        | 7 (63.6 %)                       | <i>P</i> = 0.72       |
| Family history                  | 2 (22.2 %)                        | 6 (54.5 %)                       | <i>P</i> = 0.15       |
| Obesity                         | 2 (22.2 %)                        | 5 (45.5 %)                       | <i>P</i> = 0.29       |
| Infarct-related artery          |                                   |                                  |                       |
| Left anterior descending        | n/a                               | 4 (36.4 %)                       | n/a                   |
| Circumflex                      | n/a                               | 3 (27.3 %)                       | n/a                   |
| Right coronary artery           | n/a                               | 4 (36.4 %)                       | n/a                   |

**Table S III.** Description of STEMI patients enrolled in the prospective outcome study.

| <b>Baseline characteristics</b>       | <i>n</i> = 82     |
|---------------------------------------|-------------------|
| Female sex                            | 11 (13.4 %)       |
| Age (mean, range)                     | 59.1 (40 - 79)    |
| CV risk                               |                   |
| Diabetes mellitus                     | 23 (28.0 %)       |
| Smoker                                | 26 (31.7 %)       |
| Hypertension                          | 42 (51.2 %)       |
| Hypercholesterolemia                  | 36 (43.9 %)       |
| Family history                        | 19 (23.2 %)       |
| Obesity                               | 29 (35.4 %)       |
| Infarct-related artery                |                   |
| Left anterior descending              | 37 (45.1 %)       |
| Circumflex                            | 11 (13.4 %)       |
| Right coronary artery                 | 34 (41.5 %)       |
| Laboratory parameters                 |                   |
| Basophils max – cells/nl (mean ± SD)  | 0.03 (± 0.02)     |
| cTnT 24h – pg/ml (mean ± SD)          | 2178.1 (± 2672.9) |
| CRP max – mg/l (mean ± SD)            | 43.0 (± 55.7)     |
| Leukocytes max – cells/nl (mean ± SD) | 12.0 (± 4.0)      |

**Table S IV.** Univariate regression analysis for the prospective outcome study.

| <b>Covariate</b>      | <b>R square</b> | <b>P-value</b> |
|-----------------------|-----------------|----------------|
| Sex                   | 0.0295          | 0.1231         |
| Age                   | 0.0025          | 0.6548         |
| CV risk               |                 |                |
| Diabetes mellitus     | 0.0259          | 0.1484         |
| Smoker                | 0.0185          | 0.2225         |
| Hypertension          | 0.0078          | 0.4302         |
| Hypercholesterolemia  | 0.0181          | 0.2278         |
| Family history        | 0.0014          | 0.9704         |
| Obesity               | 0.0032          | 0.6137         |
| Laboratory parameters |                 |                |
| Basophils max         | 0.1224          | 0.0013*        |
| cTnT 24h (log)        | 0.1467          | 0.0004*        |
| CRP max               | 0.1623          | 0.0002*        |
| Leukocytes max        | 0.0999          | 0.0038*        |

**Table S V.** Multivariate regression analysis for the prospective outcome study.

| <b>Covariate</b> | <b>Coefficient</b> | <b>Confidence interval</b> | <b>P-value</b> |
|------------------|--------------------|----------------------------|----------------|
| Intercept        | 0.083              | [-0.059; 0.226]            | 0.247          |
| Basophils max    | -0.017             | [-0.030; -0.005]           | 0.007*         |
| cTnT 24h (log)   | 0.065              | [0.025; 0.104]             | 0.002*         |
| CRP max          | 0.0007             | [0.0003; 0.0012]           | 0.002*         |
| Sex              | -0.073             | [-0.147; -0.0001]          | 0.049*         |

## **Supplemental methods**

### ***TTC staining***

For the detection of infarction area 24 hours after MI with TTC staining, hearts were removed and rinsed quickly in PBS. Hearts were frozen with dry ice and sliced into parallel transverse sections (thickness 1 mm). The slices were incubated in freshly prepared 2 % TTC (Sigma-Aldrich) at 37°C for 15 minutes. Each heart was recorded with a microscope and a digital camera. TTC-negative staining area (white area) was defined as infarction area.

### ***Plasma and serum measurements***

For the measurement of cardiac Troponin T (cTnT), peripheral blood was collected from facial vein puncture in a heparinized tube at indicated time points. Plasma obtained after centrifugation (4°C, 2000g, 10 minutes) was 40 times diluted in PBS and cTnT was detected using an automated Cobas Troponin T hs STAT Elecsys (Roche). For measurements of IgE, peripheral blood was collected, kept at room temperature for 30 minutes and centrifugated (2000g, 10 minutes) in order to obtain serum. Serum levels of IgE were obtained using murine IgE ELISA kits (Abcam) following the manufacturer's instructions.

### ***Isolation, Cell Culture and Stimulation of human basophils and monocytes***

For isolation of basophils and monocytes from peripheral blood of healthy donors, ethylene diamine tetra-acetic acid (EDTA)-blood was separated via density gradient centrifugation with Ficoll / Percoll (100/6, density 1.080 g/l) followed by counter flow elutriation. Basophils were further purified by magnetic cell sorting (MACS) using the basophil isolation kit II for negative selection of basophils (Miltenyi). Across the samples, ≥98% purity was achieved. After isolation, cell culture was performed in



Iscove's Modified Dulbecco's Media (IMDM; Capricorn) containing 2 mM glutamine (Capricorn), 5 µg/ml insulin (Gibco), 50 µg/ml apo-transferrin (Sigma-Aldrich), 100 µg/ml Pen/Strep (Capricorn), 10% heat-inactivated Fetal Calf Serum (GE Healthcare) and 2.5 ng/ml IL-3 (gift from Kirin Brewery, Japan) as a basophil survival factor. Basophils were stimulated overnight with a final concentration of 100 ng/ml recombinant IPSE/alpha-1, 2.5 ng/ml IL-33 (Biolegend) or both. Basophil culture supernatants were kept at -80°C until either analyzed for cytokine production by the respective cytokine-specific ELISA (IL-4 and IL-13 (Diaclone)) or further used for culture of monocytes. Therefore,  $0.25 \times 10^6$  monocytes were stimulated with 10 ng/ml LPS (Salmonella friedenau, kind gift of Prof. H. Brade, RCB) and cultured in 1 ml basophil culture supernatant per well in 24-well flat-bottom culture plates for 24 h. Monocytes were harvested and analyzed at the flow cytometer LSR II (BD Biosciences) for expression of CD206 and CD209 after staining with anti-human CD206-FITC (BD Biosciences, clone 19.2) and anti-human CD209-PE (BD Biosciences, clone DCN46).

### **Fluorescent antibodies and gating strategies**

The following antibodies were used: anti-CD45-PerCP-Cy5.5 (BD Biosciences, clone 30-F11), anti-CD45-BV510 (Biolegend, clone 30-F11), anti-CD45-FITC (BD Biosciences, clone 30-F11), anti-Ter119-PE (BD Biosciences, clone TER-119), anti-CD4-PE (Biolegend, clone RM4-5), anti-CD19-PE (BD Biosciences, clone 1D3), anti-Ly6G-PE (BD Biosciences, clone 1A8), anti-CD11c-PE (BD Biosciences, clone HL3), anti-CD117-PE-Cy7 (BD Biosciences, clone 2B8), anti-CD49b-APC (Biolegend, clone DX5), anti-FcεRI-FITC (Biolegend, clone MAR-1), anti-IgE-BV421 (BD Biosciences, clone R35-72), anti-CD90.2-PE (BD Biosciences, clone 53-2.1), anti-B220-PE (BD Biosciences, clone RA3-6B2), anti-CD49b-PE (BD Biosciences, clone DX5), anti-

NK1.1-PE (BD Biosciences, clone PK136), anti-CD11b-APC-Cy7 (BD Biosciences, clone M1/70), anti-F4/80-PE-Cy7 (Biolegend, clone BM8), anti-Ly6C-APC (BD Biosciences, clone AL-21), anti-CD64-BV421 (Biolegend, clone X54-5/7.1), anti-CD206-APC (Biolegend, clone C068C2), anti-CD11c-BV510 (Biolegend, clone N418), anti-CD3-BV421 (Biolegend, clone 17A2), anti-CD4-FITC (Biolegend, clone RM4-5), anti-CD4-PE-Cy5 (Biolegend, clone RM4-5), anti-CD8-PE (Biolegend, clone 53-6.7), anti-B220-PE-Cy7 (BD Biosciences, clone RA3-6B2), anti-Ly6G-PerCP (Biolegend, clone 1A8), anti-GFP-APC (Biolegend, clone FM264G).

Basophils were identified as CD45<sup>int/high</sup>, Lin1<sup>-</sup>(Ter119;CD4;CD19;Ly6G;CD11c), CD117<sup>-</sup>, CD49b<sup>+</sup>, IgE<sup>+</sup>. Mast cells were gated as CD45<sup>+</sup>, Lin1<sup>-</sup>, CD117<sup>+</sup>, IgE<sup>+</sup> cells. Inflammatory monocytes were identified as CD45<sup>+</sup>, Lin2<sup>-</sup>(CD90;B220;CD49b;NK1.1;Ly6G;Ter119), CD11b<sup>+</sup>, F4/80<sup>-</sup>, Ly6C<sup>high</sup>. Anti-inflammatory macrophages were identified as CD45<sup>+</sup>, Lin2<sup>-</sup>, CD11b<sup>+</sup>, F4/80<sup>+</sup>, Ly6C<sup>low</sup> CD64<sup>+</sup>. Dendritic cells were identified as CD45<sup>+</sup>, CD11b<sup>+</sup>, Ly6G<sup>-</sup>, CD11c<sup>+</sup>. CD4<sup>+</sup> T cells were gated as CD45<sup>+</sup>, CD3<sup>+</sup>, CD4<sup>+</sup> cells. CD8<sup>+</sup> T cells were identified as CD45<sup>+</sup>, CD3<sup>+</sup>, CD8<sup>+</sup> cells. B cells were gated as CD45<sup>+</sup>, CD3<sup>-</sup>, B220<sup>+</sup> cells. Neutrophils were identified as CD45<sup>+</sup>, CD11b<sup>+</sup>, Ly6G<sup>+</sup>.

### ***Quantitative real-time PCR***

The following primers were used: 18s: GCAATTATTCCCATGAACG (fwd), GGCCTCACTAAACCATCCAA (rev); Tnfa: CCCTCACACTCAGATCATCTTCT (fwd), GCTACGACGTGGGCTACAG (rev); IL6: GATGCTACCAAACCTGGATATAATC (fwd), GGTCCTTAGCCACTCCTTCTG (rev); IL13: GACTGCAGTCCTGGCTCTTGC (fwd), TGAGTCCACAGCTGAGATGCC (rev); Ifng: AGGAACTGGCAAAGGATGGT (fwd),

TCATTGAATGCTTGGCGCTG (rev); Il12b: TGGGAGTACCCTGACTCCTG (fwd),  
GAGGAACGCACCTTTCTGGT (rev); Arg1: TTTTAGGGTTACGGCCGGTG (fwd),  
CCTCGAGGCTGTCCTTTTGA (rev); Hdc: GATCAGATTTCTACCTGTGG (fwd),  
GTGTACCATCATCCACTTGG (rev); Vcam1: TCTTACCTGTGCGCTGTGAC (fwd),  
ACTGGATCTTCAGGGAATGAGT (rev); Ccl5: TGCAGAGGACTCTGAGACAGC  
(fwd), GAGTGGTGTCCGAGCCATA (rev); IL18: CAAACCTTCCAAATCACTTCCT  
(fwd), TCCTTGAAGTTGACGCAAGA (rev); IL33: GGTGAACATGAGTCCCATCA  
(fwd), CGTCACCCCTTTGAAGCTC (rev); IL4: ATCCTGCTCTTCTTTCTCGAATGT  
(fwd), GCCGATGATCTCTCTCAAGTGATT (rev).

## Supplemental figures

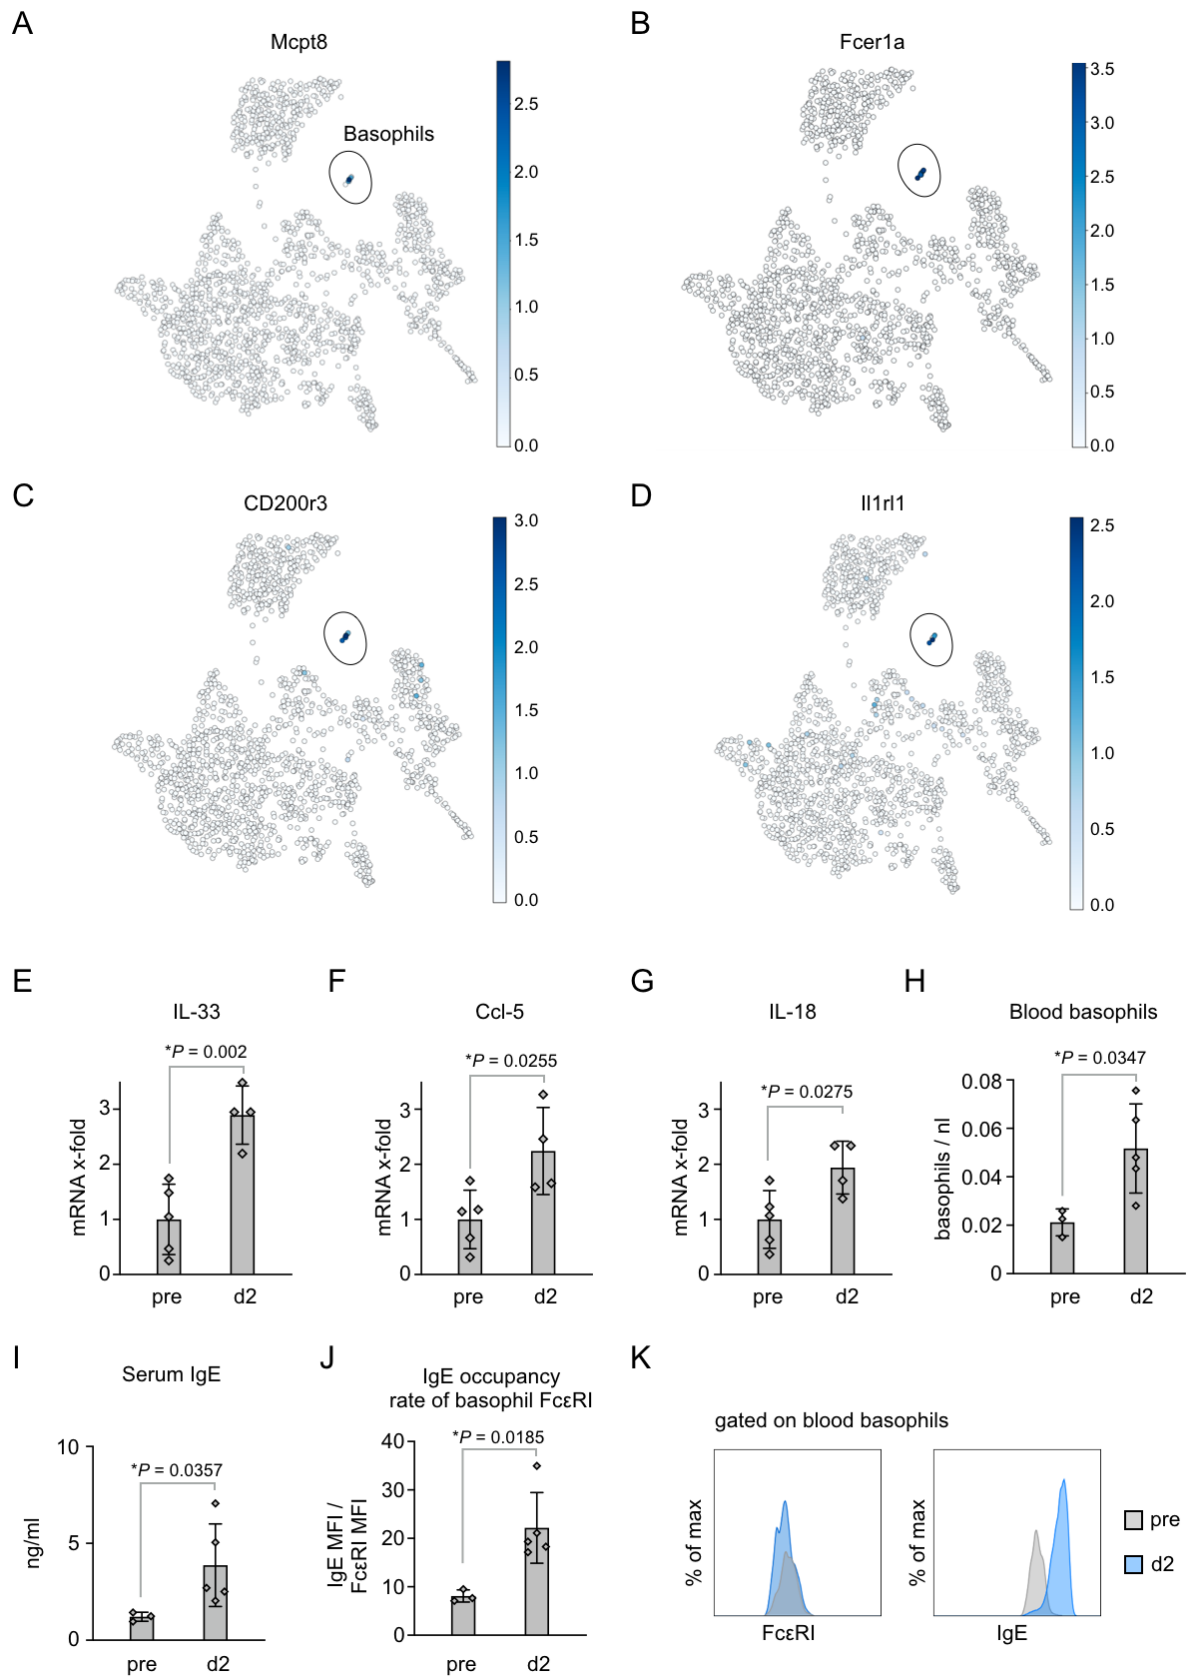

**Supplemental figure 1. Basophil markers and potential upstream mediators for basophil activation after MI.**

(A-D) Gene expression plot of basophil-specific markers (Mcp8, Fcer1a, CD200r3 and IL-33-receptor Il1rl1) in leukocyte subpopulations on d7 after MI in the UMAP embedding. (E-G) mRNA expression of basophil chemoattractants IL-33, Ccl-5 and IL-18 in either healthy hearts or infarct tissue 2 days after MI ( $n = 4-5$ ). Error bars show mean  $\pm$  SD. Asterisks signify significant differences using two-tailed Student's t test. (H and I) Levels of blood basophils based on flow cytometric analysis and serum IgE levels under steady state and 2 days after MI in mice. (J and K) Representative histograms of Fc $\epsilon$ RI and IgE expression on blood basophils obtained from both healthy and infarcted mice based on flow cytometry. IgE occupancy was defined as IgE mean fluorescence intensity (MFI) normalized to Fc $\epsilon$ RI MFI ( $n = 3-5$ ). Error bars show mean  $\pm$  SD. Asterisks signifies significant difference using two-tailed Student's t test

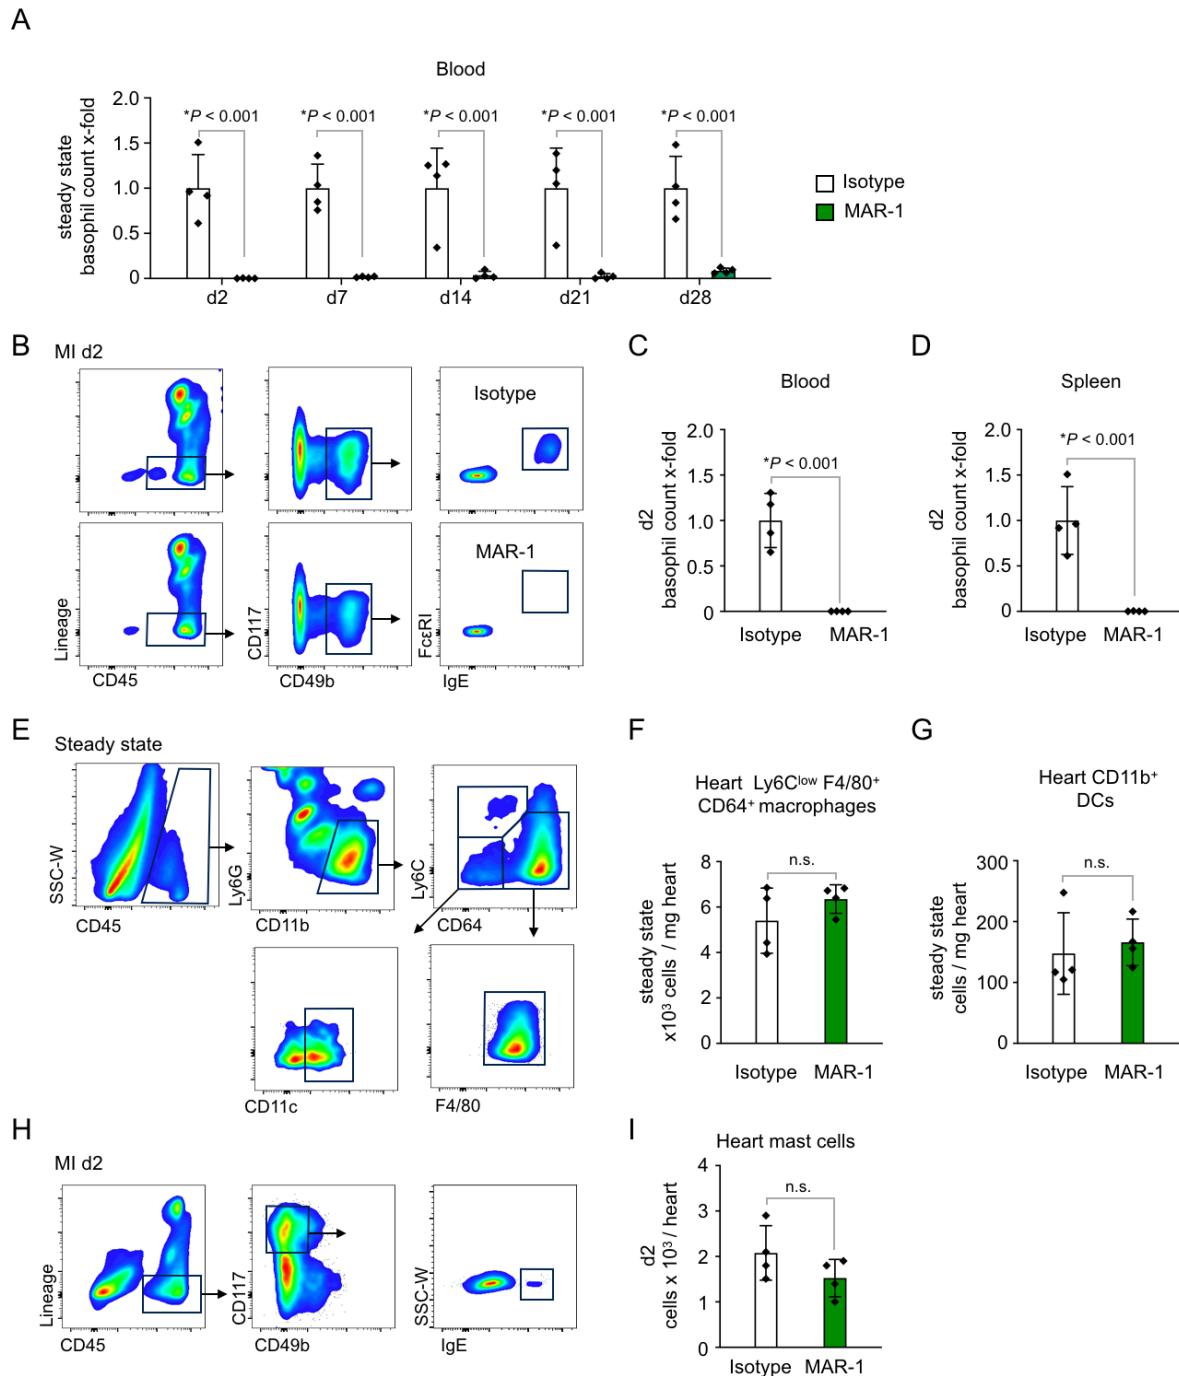

**Supplemental figure 2. Effect of MAR-1 administration under both steady state and post-MI conditions.**

(A-D) Validation of basophil depletion via MAR-1 antibody treatment in blood under steady state (A), in blood 2d post-MI (B and C) and spleen 2d post-MI (D) ( $n = 4$ ). Statistics was performed by using two-tailed Student's t test. (E) Gating strategy for identification of cardiac macrophages and dendritic cells under baseline conditions after both, IgG and MAR-1 treatment. (F and G) Absolute cell numbers of cardiac

Ly6C<sup>low</sup>F4/80<sup>+</sup>CD64<sup>+</sup> macrophages and cardiac CD11b<sup>+</sup>CD11c<sup>+</sup> dendritic cells (DCs).  
(H) Gating strategy for identification of cardiac mast cells 2 days post-MI. (I) Mast cell levels assessed 2 days after MI ( $n = 4$ ). Statistics was performed by using two-tailed Student's t test. Error bars show mean  $\pm$  SD.

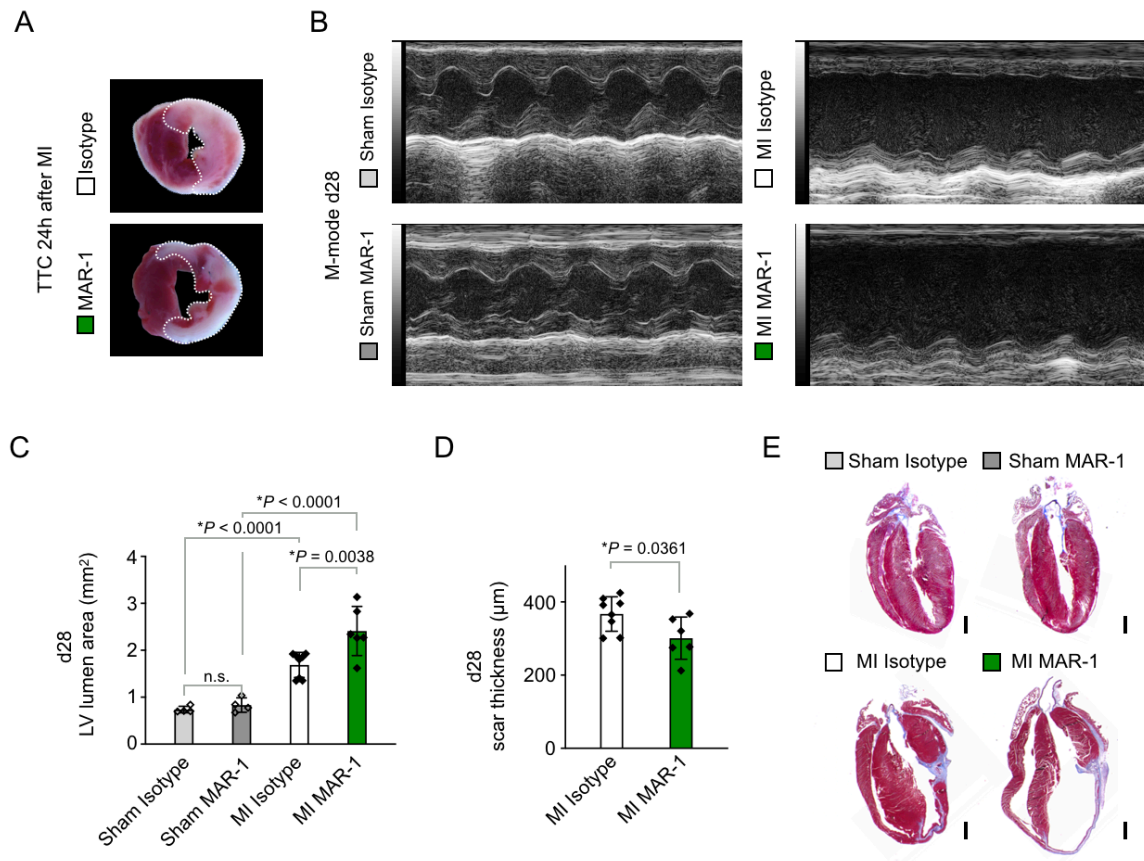

**Supplemental figure 3. Histopathological and echocardiographic evaluation of basophil-depleted mice after acute MI in mice.**

(A) Representative TTC stainings of hearts from IgG-treated and MAR-1-treated mice 24h after LAD ligation. The dotted line indicates the infarcted area. (B) Representative M-mode echocardiographic images of IgG-treated and MAR-1-treated mice 4 weeks after MI induction or sham intervention. (C and D) Quantification of left ventricular (LV) lumen area and scar thickness 4 weeks after MI ( $n = 4-8$ ). Error bars show mean  $\pm$  SD. Asterisks signify significant differences using two-way ANOVA (C) or two-tailed Student's t test (D). (E) Representative histological sections stained with Masson's trichrome 4 weeks after MI. The scale bar indicates 500  $\mu\text{m}$ .



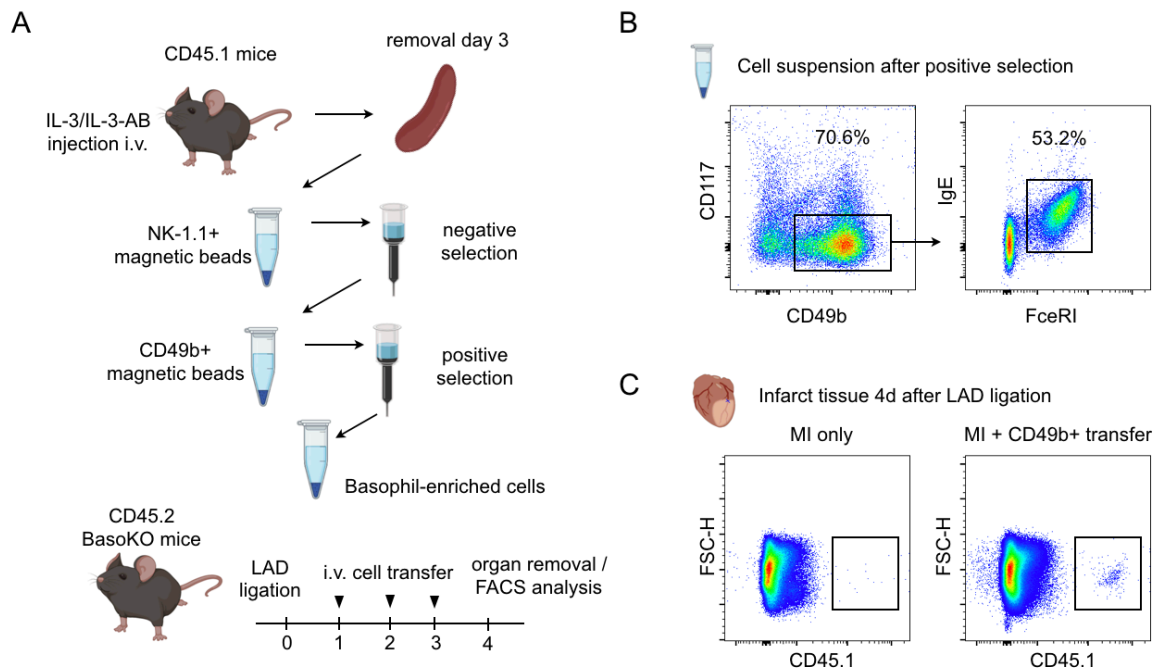

**Supplemental figure 4. Reconstitution of basophils in BasoKO mice by adoptive transfer of basophil-enriched CD49b<sup>+</sup> splenocytes.**

(A) Schematic and validation of the basophil transfer model. IL-3/IL-3-antibody-treated CD45.1 mice served as donors. Following negative selection of Nk1.1<sup>-</sup> cells from splenic single cell suspensions, basophils were enriched by using CD49b<sup>+</sup> magnetic beads. Basophil-enriched cells were adoptively transferred into CD45.2 BasoKO mice on day 1-3 after experimental MI. The scheme was created with BioRender. (B) Representative images of flow cytometric analysis of cell suspensions after positive selection step. Approximately 30-40% of all cells were found to be CD117<sup>+</sup>CD49b<sup>+</sup>FcεRI<sup>+</sup>IgE<sup>+</sup> basophils. (C) Frequencies of CD45.1<sup>+</sup> cells were assessed 4 days after MI via flow cytometric analysis of hearts from CD45.2 BasoKO mice after transfer of basophil-enriched cells or MI only.

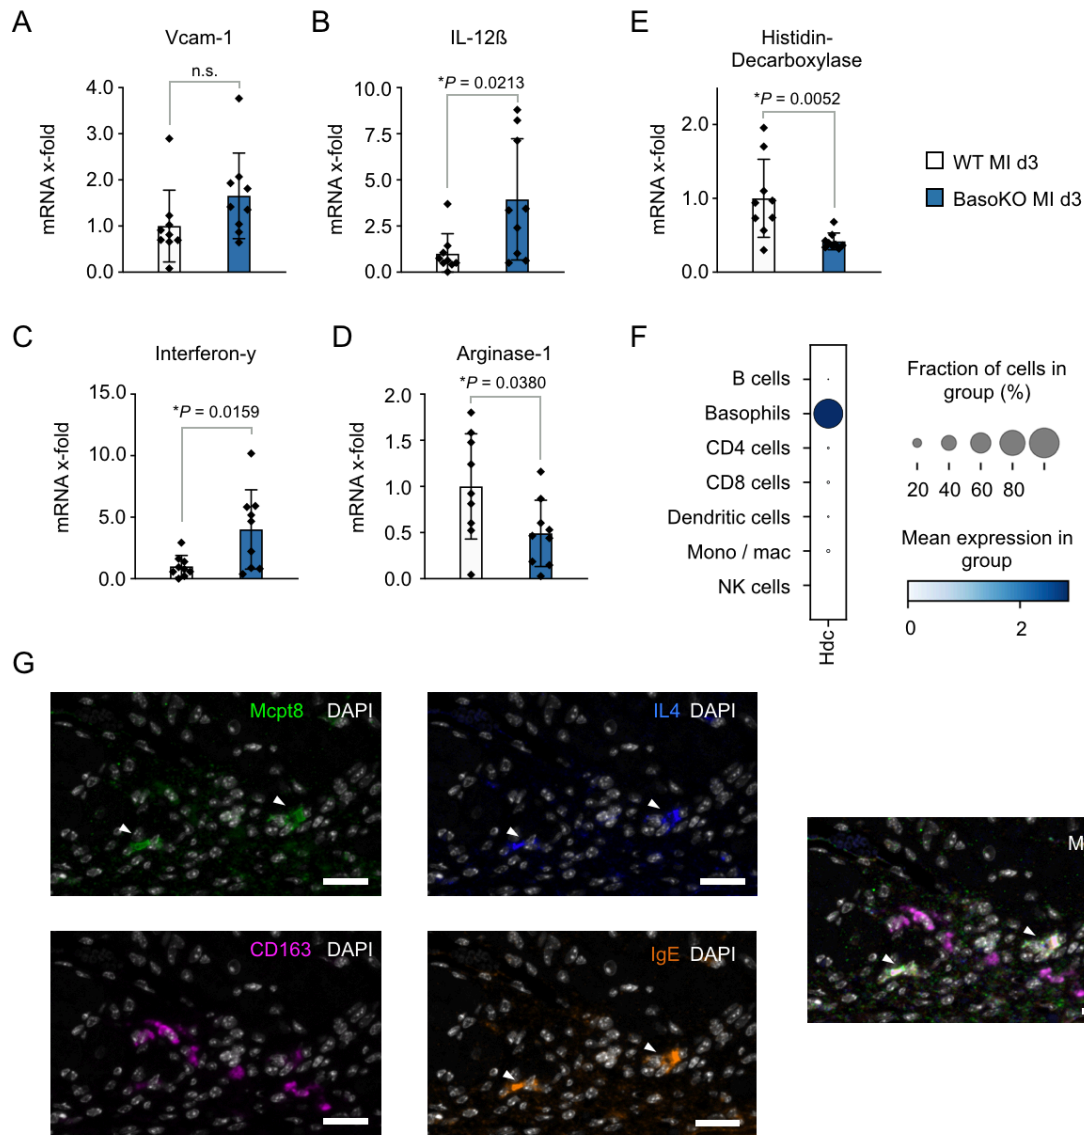

**Supplemental figure 5. Basophils can be localized in close proximity to macrophages and influence macrophage polarization after MI.**

(A-D) mRNA expression of Vcam-1, M1 markers IL-12 $\beta$  and Interferon- $\gamma$ , and M2 marker/mediator Arginase I, in infarct tissue homogenates of WT and BasoKO mice 3 days after LAD ligation ( $n = 8-9$ ). Error bars show mean  $\pm$  SD. Asterisks signify significant differences using two-tailed Student's t test. (E) mRNA expression of Histidin-Decarboxylase (Hdc) in infarct tissue homogenates of WT and BasoKO mice 3 days after LAD ligation. (F) Gene expression dot plot of Hdc gene based on single-cell RNA sequencing analysis. Mean expression is depicted as color intensity, while

dot size represents fraction of cells expressing Hdc. **(G)** Multiplex immunohistochemistry of murine infarct tissue with staining of Mcpt8 (green), IL-4 (blue), IgE (orange), CD163 (violet), and DAPI (white). Arrowheads mark Mcpt8<sup>+</sup> cells. Scale bar indicates 20  $\mu\text{m}$ .

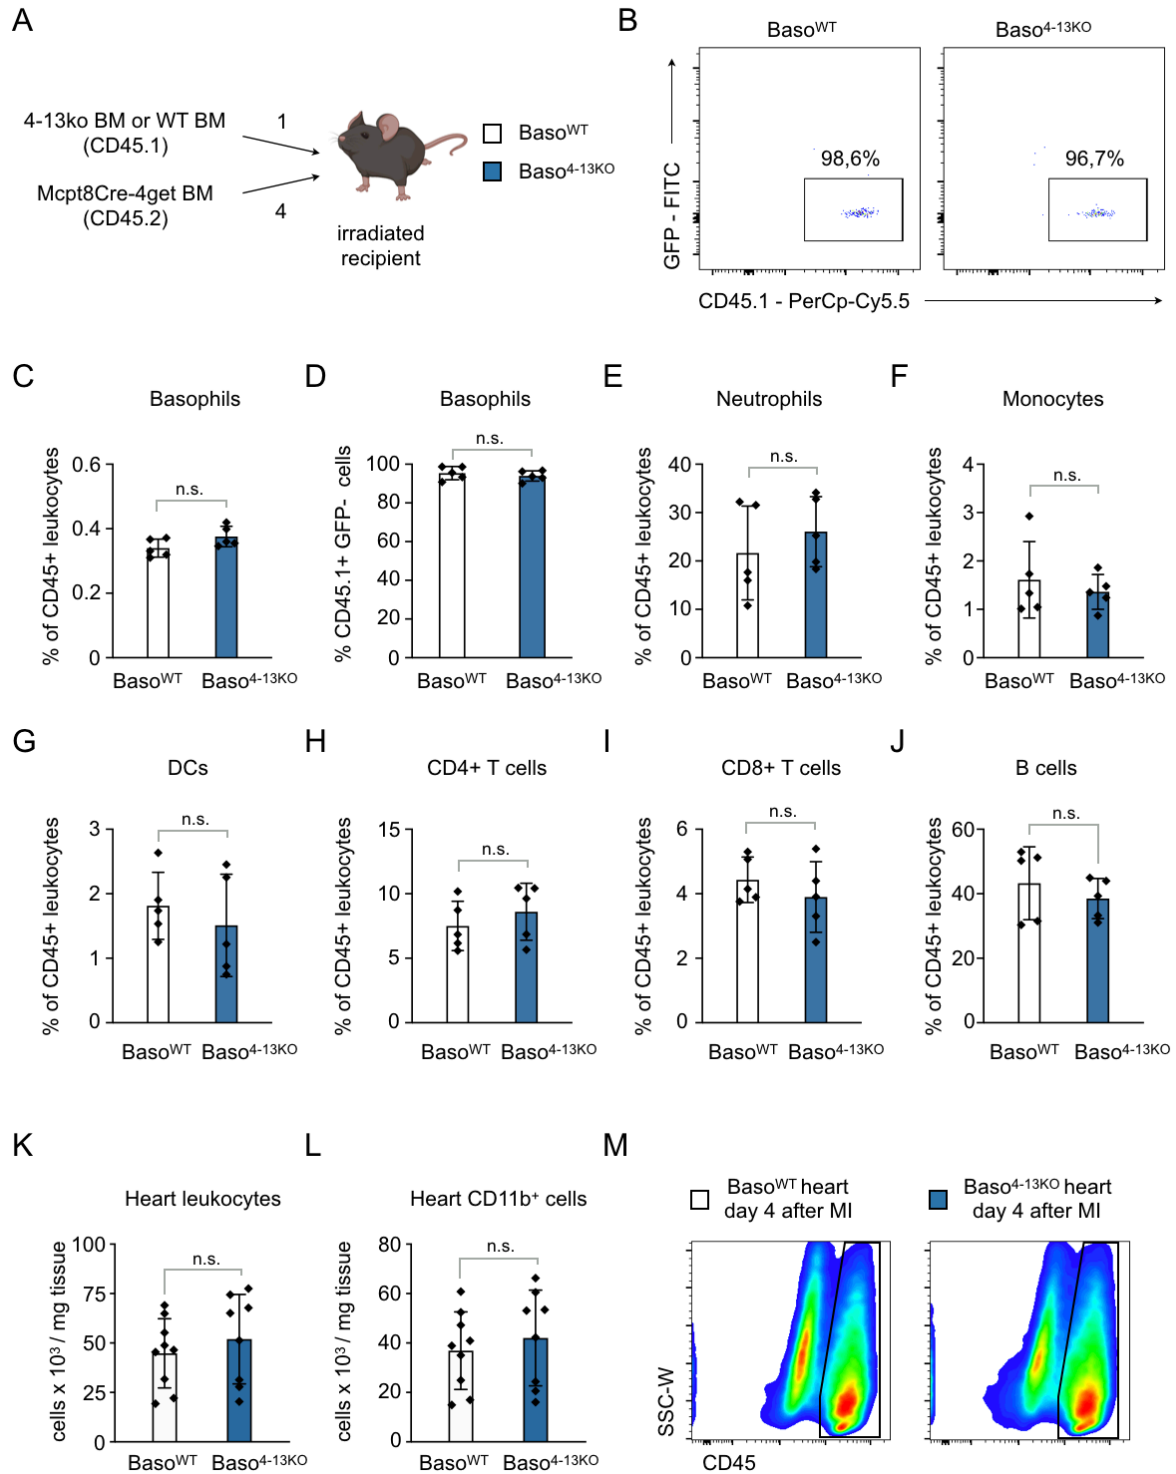

**Supplemental figure 6. Generation and characterization of mice with basophil-specific IL-4/IL-13 deficiency.**

**(A)** Schematic of the generation of mixed bone marrow chimeras. Mcpt8Cre-4get BM was mixed at a 4:1 ratio with BM from either WT mice (CD45.1) or 4-13KO mice and injected intravenously into lethally irradiated recipient mice. **(B-D)** Number of basophils

in blood from Baso<sup>WT</sup> or Baso<sup>4-13KO</sup> mice and percentage of CD45.1+ GFP- cells within basophils. **(E-J)** Number of neutrophils, monocytes, DCs, CD4<sup>+</sup> T cells, CD8<sup>+</sup> T cells, and B cells in blood from Baso<sup>WT</sup> or Baso<sup>4-13KO</sup> mice under steady state ( $n = 5$ ). Error bars show mean  $\pm$  SD. For statistics, two-tailed Student's t test was performed. **(K and L)** Quantification of total cell numbers per mg heart tissue of CD45<sup>+</sup> cells or CD45<sup>+</sup>CD11b<sup>+</sup> cells 4 days post-MI in Baso<sup>WT</sup> and Baso<sup>4-13KO</sup> mice ( $n = 8-9$ ). **(M)** Representative images of flow cytometric analysis of heart tissue of indicated groups 4 days post-MI.

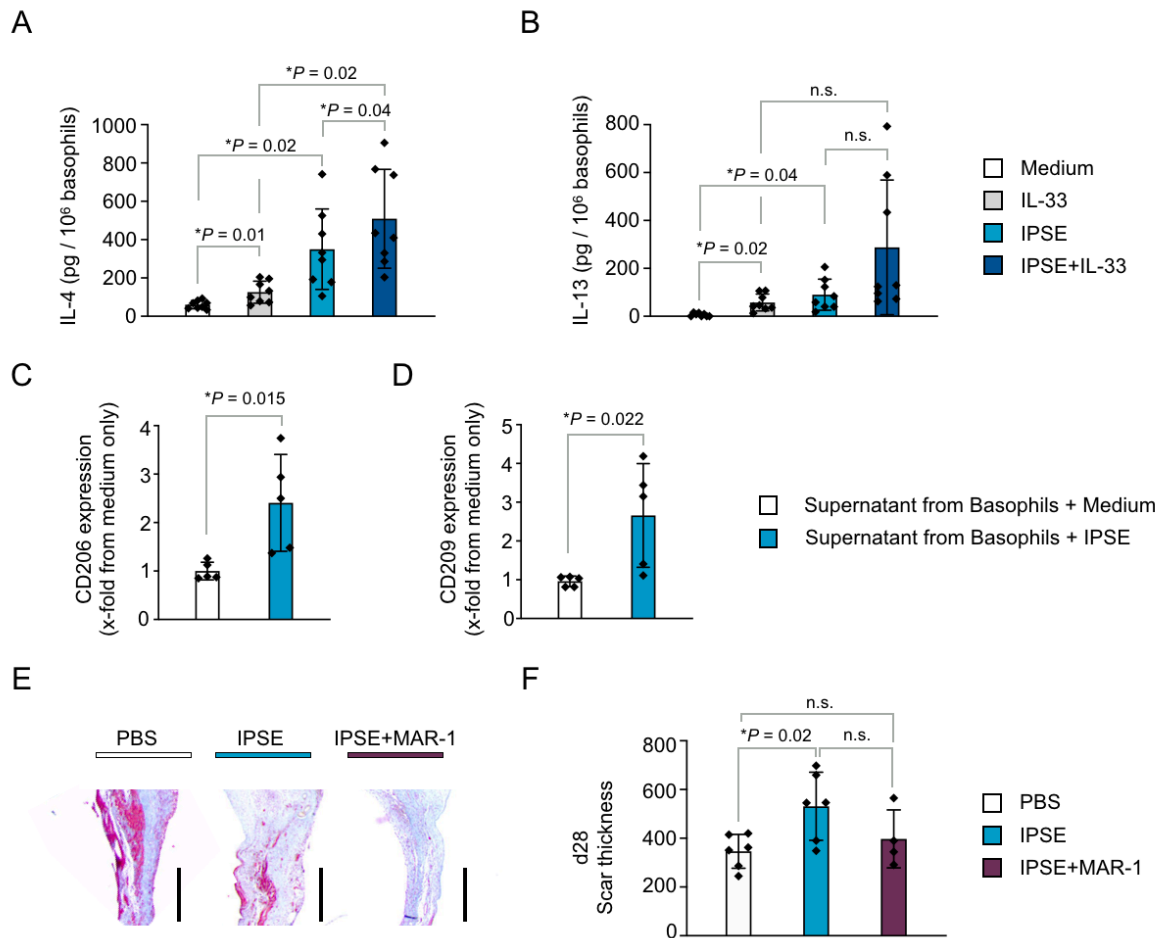

**Supplemental figure 7. Effect of IPSE/ $\alpha$ -1 on monocyte/macrophage polarization and cardiac remodeling.**

(A and B) Release of IL-4 (A) and IL-13 (B) of basophils after in vitro stimulation with IL-33, IPSE/ $\alpha$ -1 and IL-33+IPSE/ $\alpha$ -1 ( $n = 8$ ). Error bars show mean  $\pm$  SD. Asterisks signify significant differences using repeated-measures one-way ANOVA with Sidak's multiple comparisons test. (C and D) Expression of CD206 and CD209 on LPS-activated monocytes cultured with supernatant obtained from either control basophils (cultured with medium only) or basophils stimulated with IPSE/ $\alpha$ -1. Quantification was based on flow cytometric analysis. Error bars show mean  $\pm$  SD. Asterisks indicate significant differences using two-tailed Student's t test. (E) Representative histological sections depicting scar area 4 weeks after MI. The scale

bar indicates 500  $\mu\text{m}$ . **(F)** Quantification of scar thickness 4 weeks after MI ( $n = 4-6$ ). Error bars show mean  $\pm$  SD. Asterisks signify significant differences using one-way ANOVA with Tukey's multiple comparisons test.
